# Supplementary material for: Structural investigation of sulfobetaines and phospholipid monolayers at the air–water interface
Source: Royal Society of Chemistry journal article supplement (doi:10.1039/d2cp02695c), 2022-01-01
Supplement: d2cp02695c1.pdf [file d2cp02695c1.pdf]

## Synthesis of deuterated SB3-18

### Preparation of *N*-(<sup>2</sup>H<sub>37</sub>-octadecyl)-*N,N*-dimethylamine

The preparation method for the production of this compound was adapted by Hazell *et al.*<sup>1</sup> from a process published by Menger *et al.*<sup>2</sup> Deuterated Bromooctadecane (0.5 g) was dissolved in ethanol, 2 mL and dimethylamine solution (5.6 M in ethanol), 2.4 ml, was added dropwise under N<sub>2</sub>. This was then heated to 75 °C for 2 hours and allowed to cool. The solution was then dried under reduced pressure and NaOH, 1M 30mL, and hexane, 3 x 30ml, added to the resulting white solid. The phases were then separated, and the organic phase dried over MgSO<sub>4</sub>. The resulting solution was then dried under reduced pressure to give 0.3154g (70 %) of *N*-(<sup>2</sup>H<sub>37</sub>-octadecyl)-*N,N*-dimethylamine. <sup>1</sup>H NMR (250Hz, CDCl<sub>3</sub>) δ 2.21 (s, 6H, -CH<sub>3</sub>), as reported by Hazell *et al.*<sup>1</sup>

### Preparation of <sup>2</sup> 3-(dimethyl(octadecyl)ammonio)propane-1-sulfonate

Again this synthetic route was taken from Hazell *et al.*<sup>1</sup> who have modified it from Qu *et al.*<sup>3</sup> The product above, *N*-(<sup>2</sup>H<sub>37</sub>-octadecyl)-*N,N*-dimethylamine, (0.25g) was dissolved in acetone, (2.5 mL) and added dropwise to a solution of 1,3 propanesulfonate, (0.44 g), in acetone, (4 mL). This was heated to reflux for 18 hours and then allowed to cool prior to filtration of the white solid. This was then washed with acetone and recrystallized in an acetone/methanol mix prior to drying under high vacuum. 0.09g, (27 %) of 3-(dimethyl(<sup>2</sup>H<sub>37</sub>-octadecyl)ammonio)propane-1-sulfonate was produced. <sup>1</sup>H NMR (500Hz, CDCl<sub>3</sub>) δ 3.72 (t, 2H, CH<sub>2</sub>), δ 3.14 (s, 6H, CH<sub>3</sub>), δ 2.70 (t, 2H, CH<sub>2</sub>), δ 2.24 (m, 2H, CH<sub>2</sub>), solvent peak at δ 2.17, acetone and δ 1.79, water

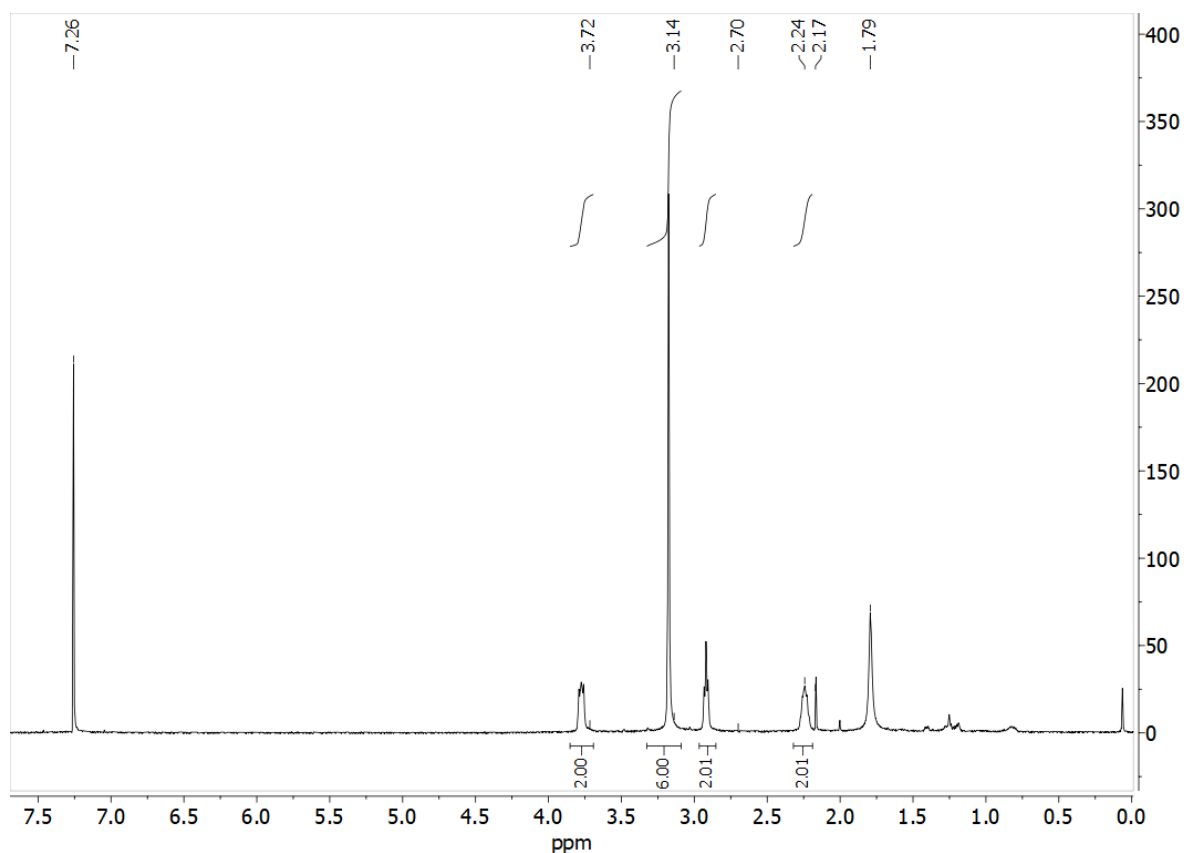

Figure 1: Proton NMR for deuterated SB3-18: 3-[dimethyl(<sup>2</sup>H<sub>37</sub>-octadecyl)ammonio]propane-1-sulfonate

## Pressure-Area isotherms for SB3-18: DMPC mixtures

**Table 1:** Physical parameters derived from pressure-area isotherms for mixtures of DMPC and SB3-18, error in areas is 5% from systematic errors in calibration and sample preparation. Errors in collapse point and compressional modulus were calculated from maximum and minimum values of repeats

| Sample | Collapse Point<br>$\text{mNm}^{-1}$ | Collapse Area<br>$\text{\AA}^2$ | Limiting area<br>$\text{\AA}^2$ | Compression modulus<br>$\text{mN m}^{-1}$ |
|--------|-------------------------------------|---------------------------------|---------------------------------|-------------------------------------------|
| DMPC   | $45 \pm 1$                          | 45                              | 77                              | $115 \pm 4$                               |
| 3:1    | $44 \pm 3$                          | 39                              | 70                              | $100 \pm 3$                               |
| 1:1    | $43 \pm 2$                          | 37                              | 66                              | $93 \pm 3$                                |
| 1:3    | $41 \pm 5$                          | 33                              | 61                              | $78 \pm 1$                                |
| SB3-18 | $37 \pm 2$                          | 35                              | 69                              | $57 \pm 4$                                |

**Table 2:** Excess APM and  $\Delta G_{\text{excess}}$  values calculated from pressure-area isotherm data. <sup>4</sup>

| Sample | $15\text{mNm}^{-1}$                           |                                                    | $35\text{mNm}^{-1}$                           |                                                    |
|--------|-----------------------------------------------|----------------------------------------------------|-----------------------------------------------|----------------------------------------------------|
|        | Excess APM,<br>$\text{\AA}^2/\text{molecule}$ | $\Delta G_{\text{excess}},$<br>$\text{kJmol}^{-1}$ | Excess APM,<br>$\text{\AA}^2/\text{molecule}$ | $\Delta G_{\text{excess}},$<br>$\text{kJmol}^{-1}$ |
| DMPC   | -                                             | -                                                  | -                                             | -                                                  |
| 3:1    | 0                                             | 0                                                  | -1.35                                         | -0.28                                              |
| 1:1    | -3.6                                          | -0.32                                              | -0.5                                          | -0.11                                              |
| 1:3    | -4.1                                          | -0.37                                              | -1.45                                         | -0.31                                              |
| SB3-18 | -                                             | -                                                  | -                                             | -                                                  |

### Peak positions from XRR data

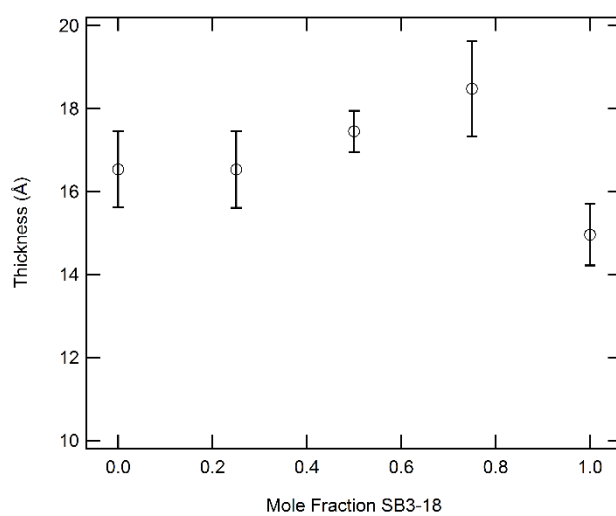

**Figure 2:** Thickness of the monolayers at  $15\text{ mNm}^{-1}$ , extracted from the data in Fig. 4 in the main paper, errors are from determined variations in the minima.

### Fitted Reflectivity Data

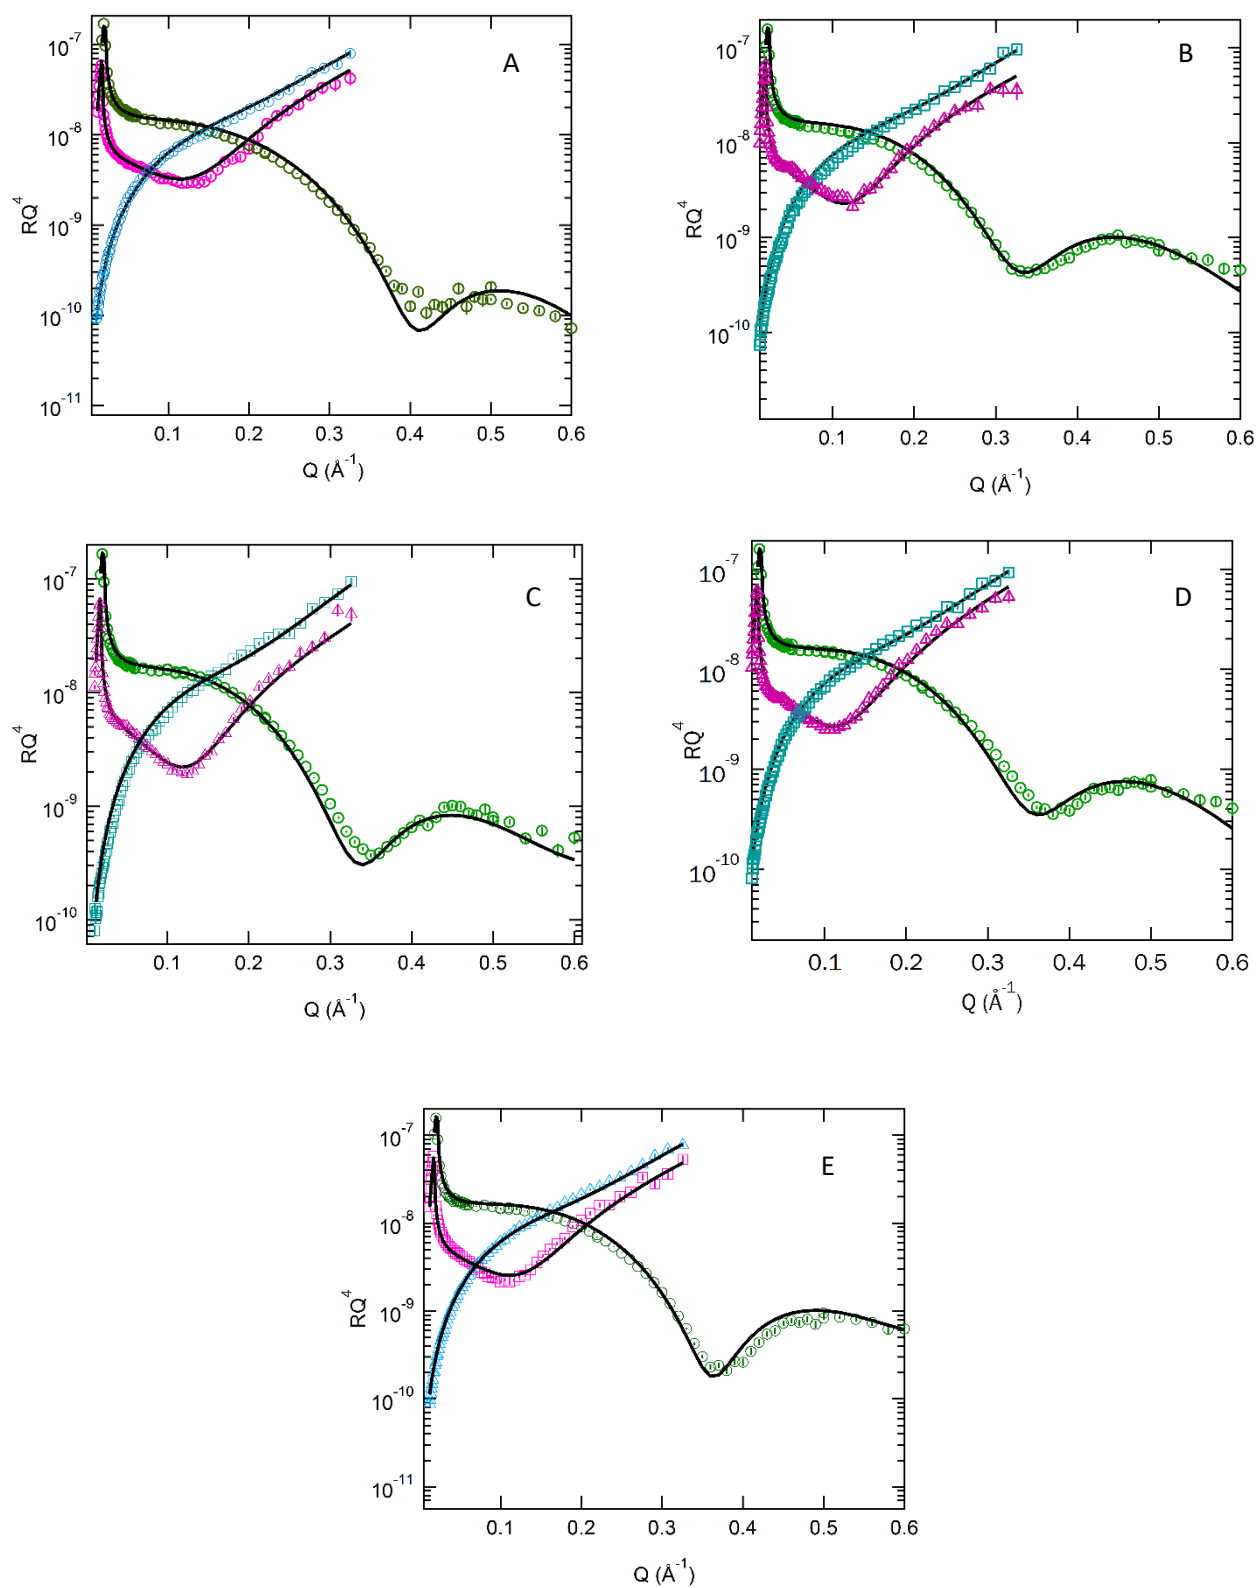

**Figure 3:** Fitted co-refined reflectivity data for monolayers at 15 mNm<sup>-1</sup>, green=XRR data, Blue: NR data for deuterated compounds on D<sub>2</sub>O, Pink: NR data for deuterated compounds on ACMW a: SB3-18, B: 1:3 DMPC: SB3-18, C: 1:1 DMPC: SB3-18, D: 3:1 DMPC: SB3-18, E: DMPC

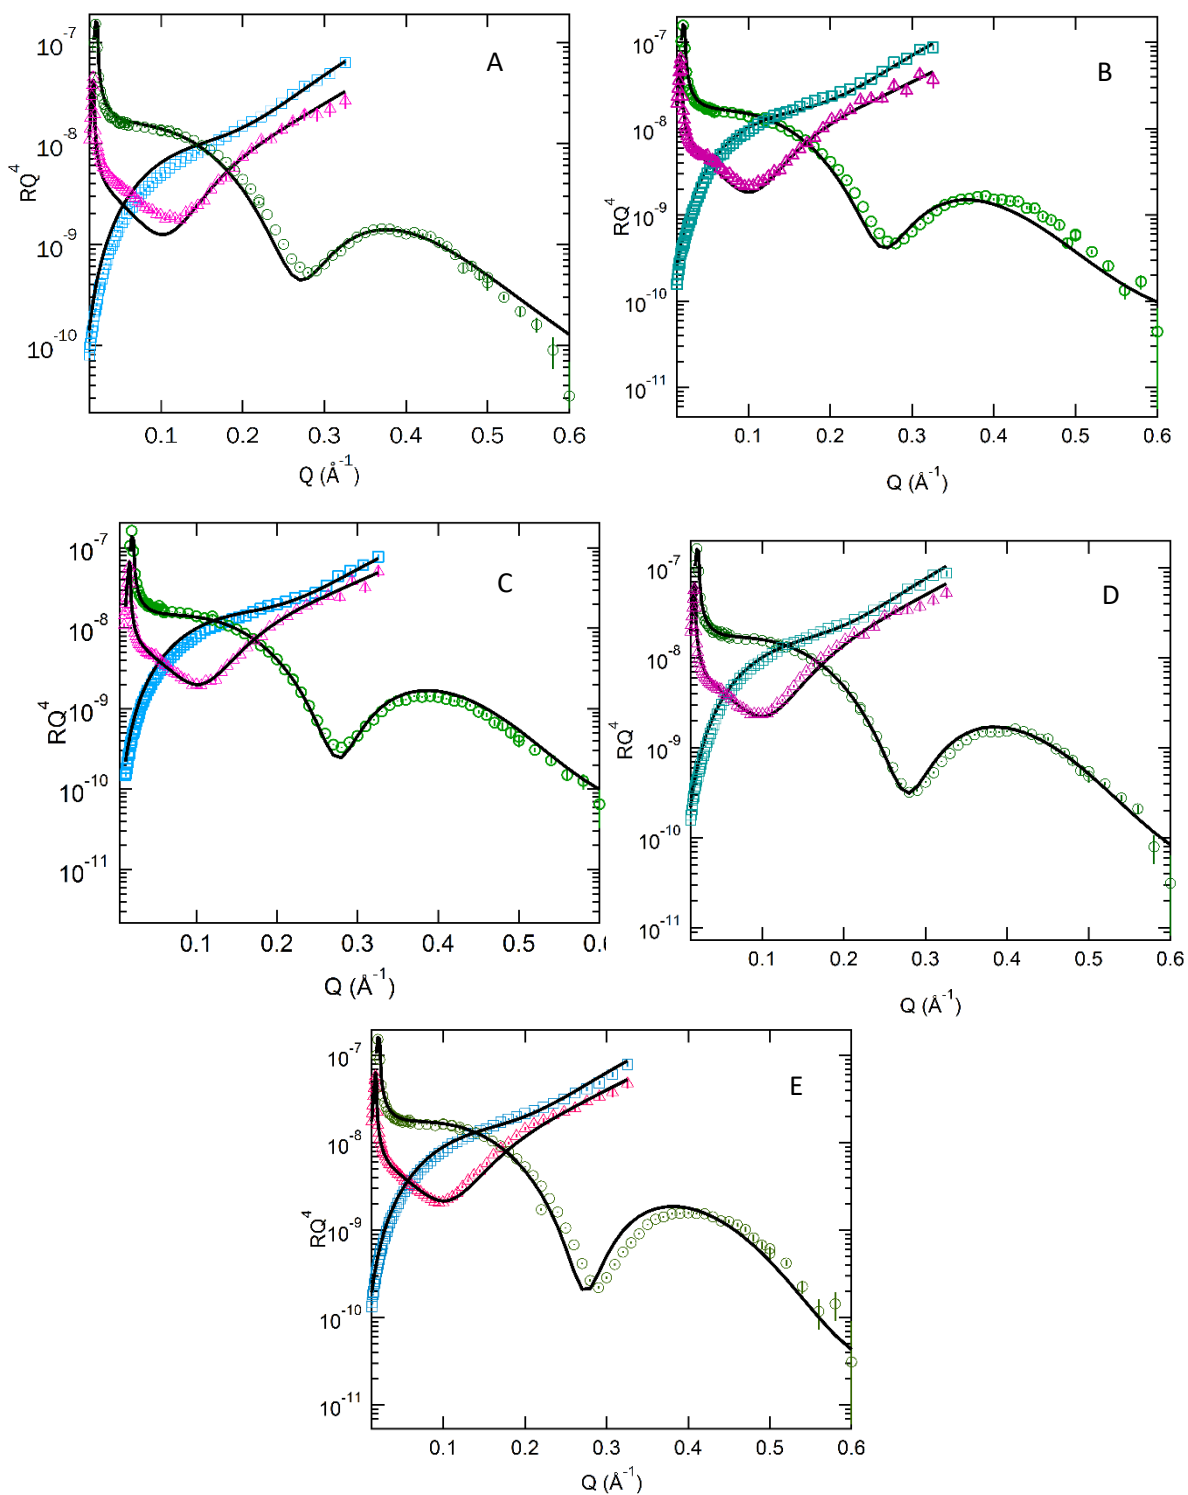

**Figure 4:** Fitted co-refined reflectivity data for monolayers at  $35 \text{ mNm}^{-1}$ , green= XRR data, Blue: NR data for deuterated compounds on  $D_2O$ , Pink: NR data for deuterated compounds on ACMW a: SB3-18, B: 1:3 DMPC: SB3-18, C: 1:1 DMPC:SB3-18, D: 3:1 DMPC: SB3-18, E: DMPC

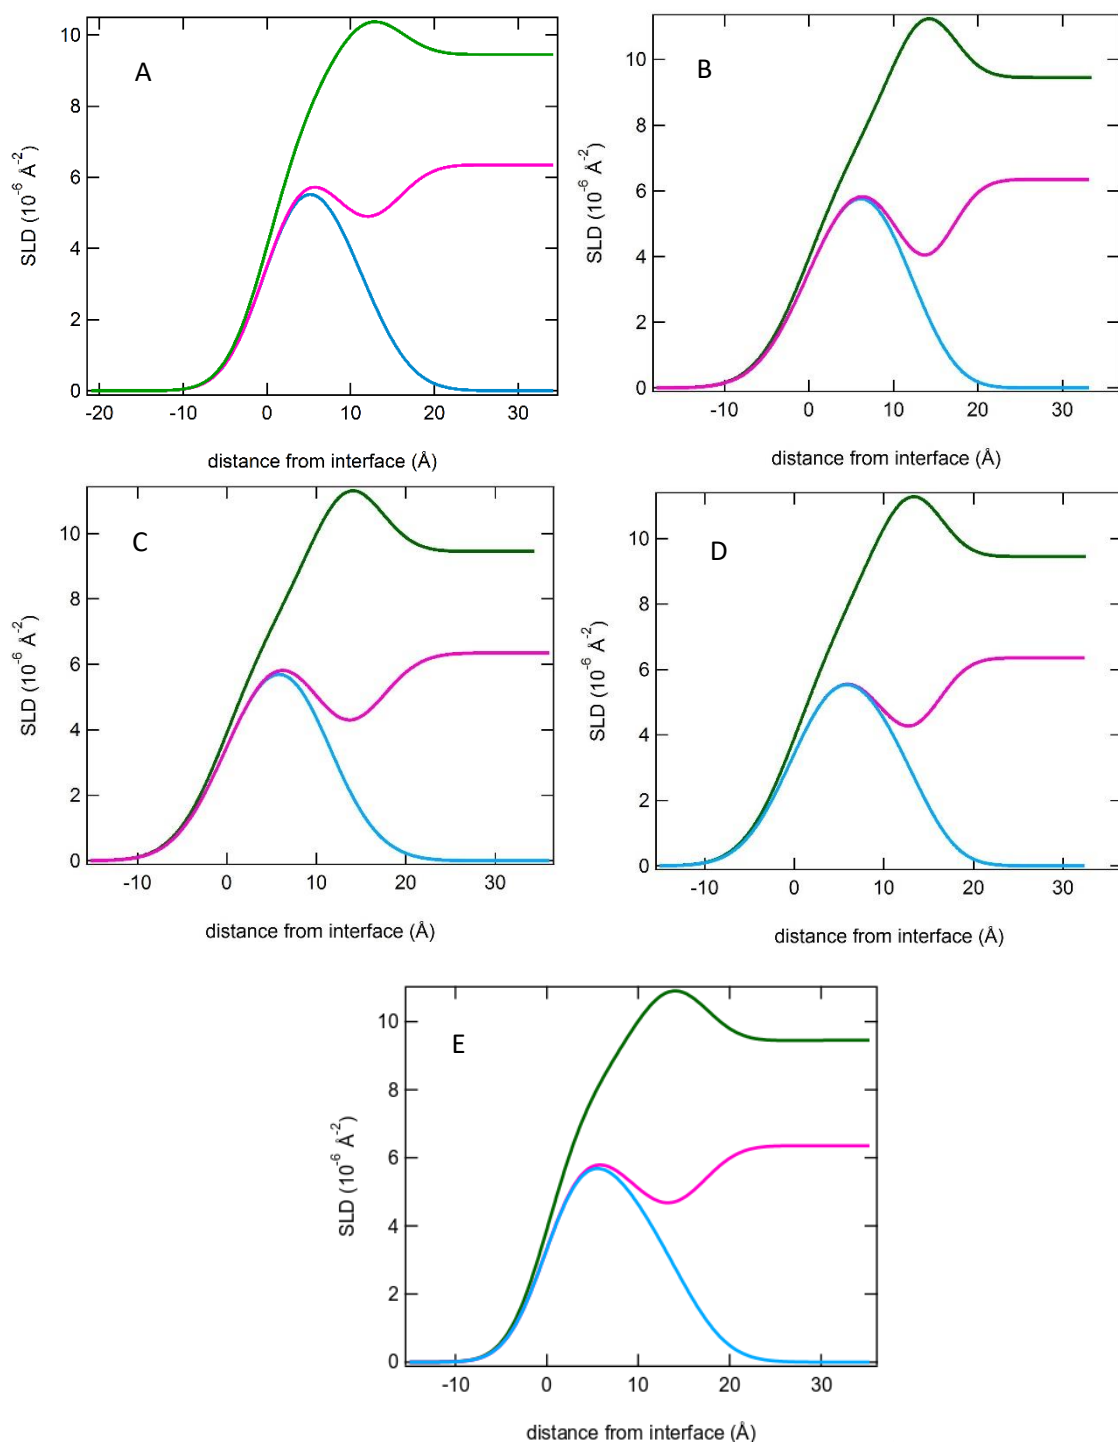

**Figure 5:** SLD profiles for the mixtures of DMPC and SB3-18 at 15mNm<sup>-1</sup>, top left: SB3-18 top right 1:3, middle left 1:1 middle right 3:1, Bottom: DMPC, the values associated with this are reported in Table 3 in the main paper

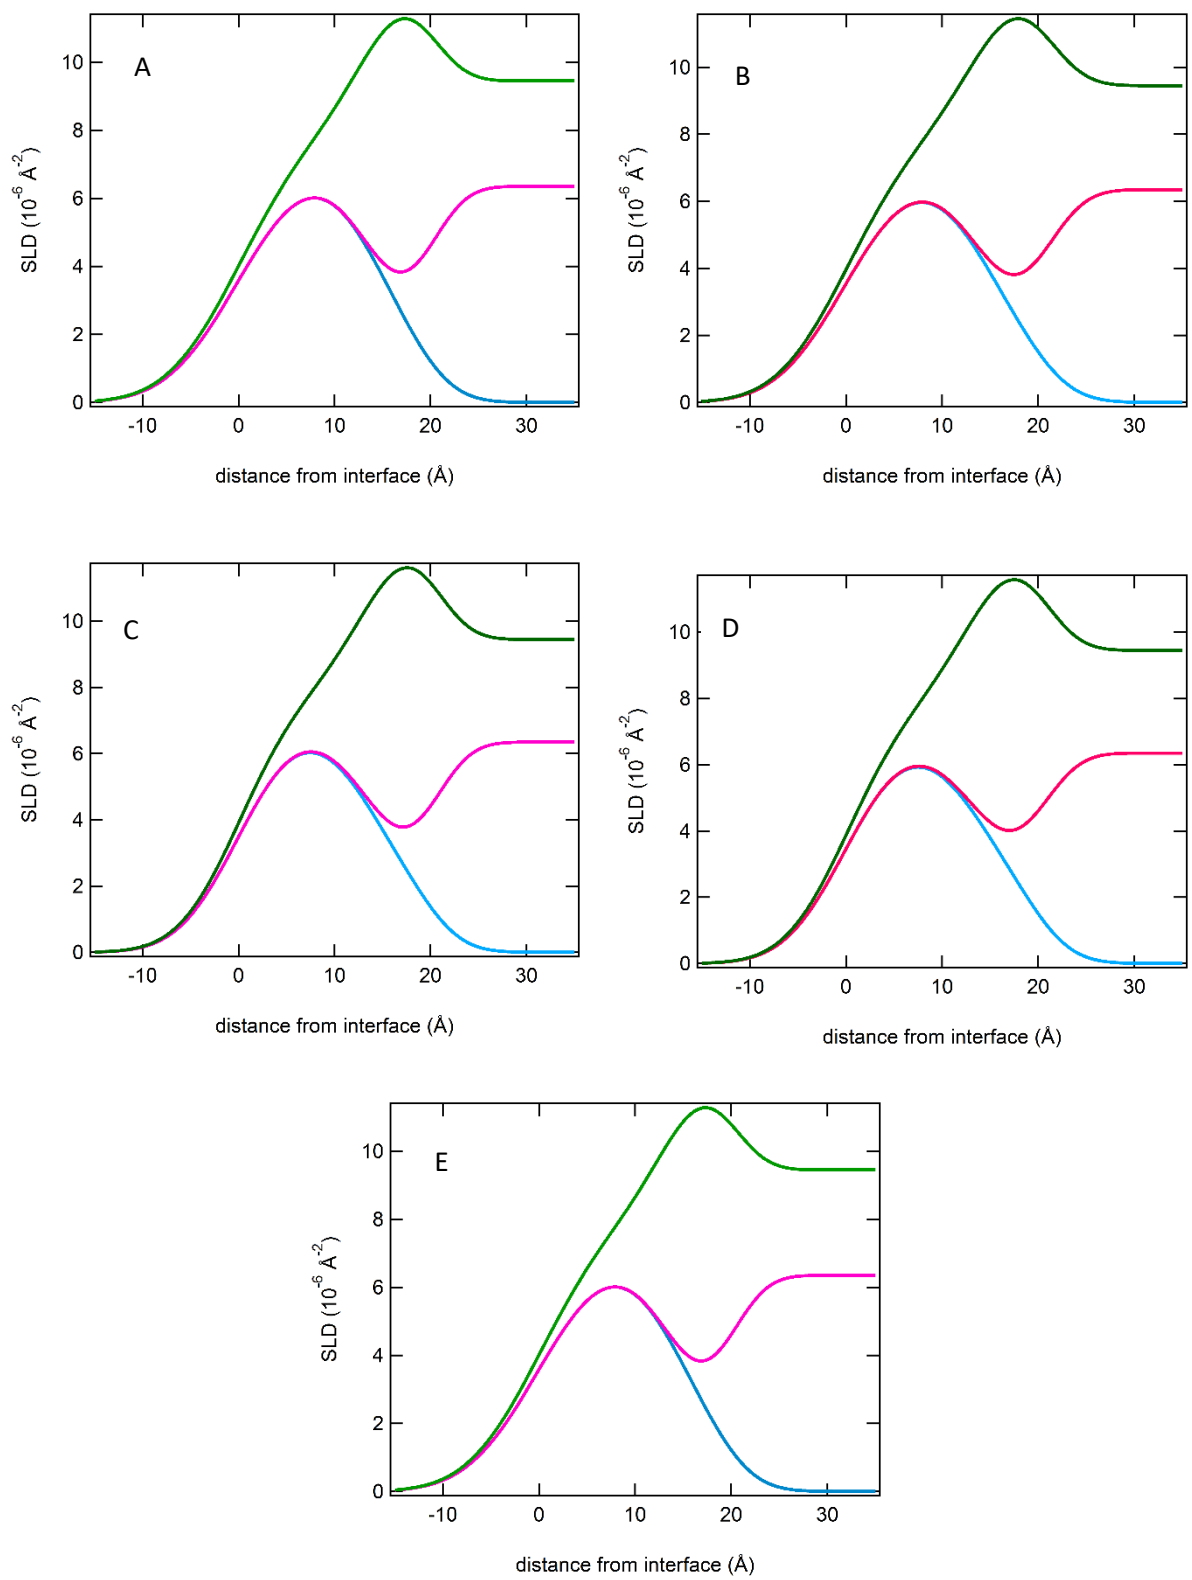

**Figure 6:** SLD profiles for the mixtures of DMPC and SB3-18 at 35mNm<sup>-1</sup>, top left: SB3-18 top right 1:3, middle left 1:1 middle right 3:1, Bottom: DMPC, the values associated with this are reported in Table 4 in the main paper

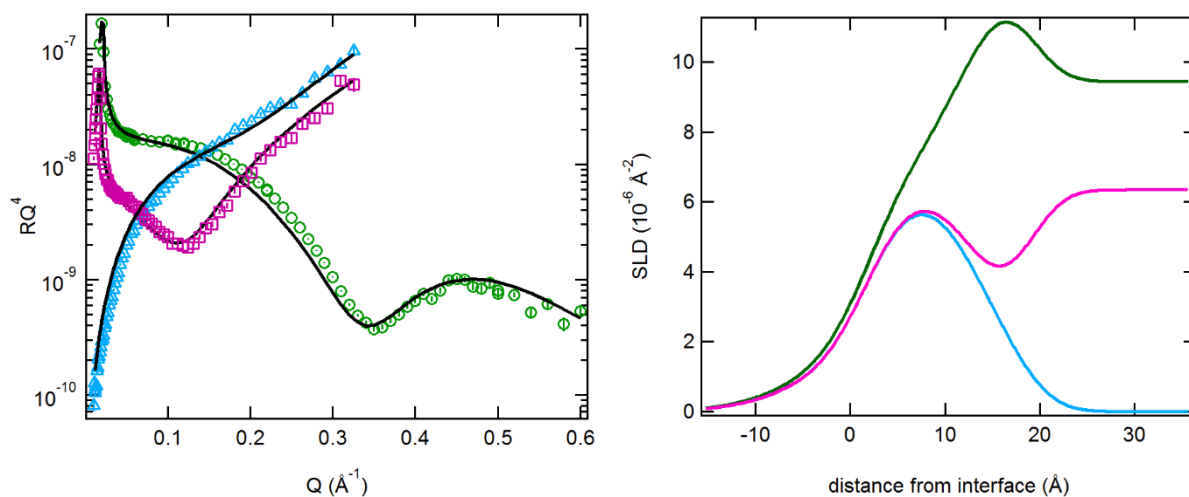

**Figure 7:** Three slab model fit to the 1:1 DMPC:SB3-18 mixture data at 15 mNm<sup>-1</sup>. Left: Fitted co-refined reflectivity data. Right: SLD profile for this fit.

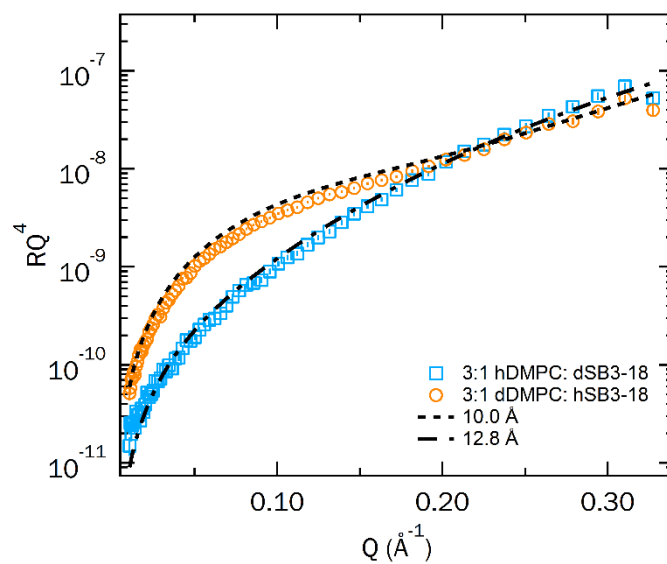

**Figure 8:** Models for the fitting of NR data from a monolayer consisting of a 3:1 mixture of DMPC and SB3-18. Dotted and dashed lines indicate the thickness of the two components at a tail tilt of 55.8°. Error bars on the NR data are shown but are within the symbol size.

## Comparison of the area per molecule calculated from fitting reflectivity data and pressure-area isotherms

**Table 3:** Comparison of calculated APM, as shown in Equation 3 of the main body of the paper, and APM from Pressure-area isotherms, with the associated 5% systematic error.

| Sample          | Surface pressure    | APM Theory,<br>$\text{\AA}^2$ | APM Isotherm,<br>$\text{\AA}^2$ | % Difference |
|-----------------|---------------------|-------------------------------|---------------------------------|--------------|
| DMPC            | $15\text{mNm}^{-1}$ | 69.9                          | 67.4                            | 3.6%         |
| DMPC            | $35\text{mNm}^{-1}$ | 57.5                          | 54.2                            | 5.6%         |
| 3:1 DMPC:SB3-18 | $15\text{mNm}^{-1}$ | 65.0                          | 60.1                            | 8.1%         |
| 3:1 DMPC:SB3-18 | $35\text{mNm}^{-1}$ | 50.6                          | 47.3                            | 7.0%         |
| 1:1 DMPC:SB3-18 | $15\text{mNm}^{-1}$ | 56.4                          | 55.1                            | 2.3%         |
| 1:1 DMPC:SB3-18 | $35\text{mNm}^{-1}$ | 45.9                          | 42.6                            | 7.7%         |
| 1:3 DMPC:SB3-18 | $15\text{mNm}^{-1}$ | 50.9                          | 49.5                            | 2.8%         |
| 1:3 DMPC:SB3-18 | $35\text{mNm}^{-1}$ | 39.4                          | 36.5                            | 7.9%         |
| SB3-18          | $15\text{mNm}^{-1}$ | 50.0                          | 47.0                            | 6.3%         |
| SB3-18          | $35\text{mNm}^{-1}$ | 35.3                          | 32.1                            | 9.9%         |



## Comparison of the parameter reported by Johnson *et al.*<sup>5</sup> and those we obtained while fitting the DMPC data

**Table 4:** Comparison of our current fit with the values from Johnson *et al.* for DMPC

| DMPC Fit Comparison                                    | Johnson <i>et al.</i><br>(22°C, 10mNm <sup>-1</sup> ) | Johnson <i>et al.</i><br>(22°C, 30mNm <sup>-1</sup> ) | This work (22°C,<br>15mNm <sup>-1</sup> ) | This work (22°C,<br>35mNm <sup>-1</sup> ) |
|--------------------------------------------------------|-------------------------------------------------------|-------------------------------------------------------|-------------------------------------------|-------------------------------------------|
| Head SLD (neutron) / $\times 10^{-6} \text{ \AA}^{-2}$ | 1.75                                                  |                                                       | 1.9                                       |                                           |
| Headgroup Volume / $\text{\AA}^3$                      | 344                                                   |                                                       | 319                                       |                                           |
| Headgroup Thickness / $\text{\AA}$                     | 9.6 $\pm$ 1.5                                         | 10.7 $\pm$ 1.5                                        | 5.1 $\pm$ 0.5                             | 7.2 $\pm$ 0.4                             |
| Headgroup Roughness / $\text{\AA}$                     | not reported                                          | not reported                                          | 5.3 $\pm$ 0.8                             | 5.0 $\pm$ 0.8                             |
| Headgroup Solvation / %                                | 70                                                    | 57                                                    | 11 $\pm$ 8                                | 20 $\pm$ 7                                |
| Tail SLD (neutron) / $\times 10^{-6} \text{ \AA}^{-2}$ | -0.41 / 6.65                                          |                                                       | -0.37 / 6.8                               |                                           |
| Tail Volume / $\text{\AA}^3$                           | 800 / 711                                             |                                                       | 782                                       |                                           |
| Tail Thickness / $\text{\AA}$                          | 11.4 $\pm$ 1.5                                        | 15.8 $\pm$ 1.5                                        | 11.2 $\pm$ 1.0                            | 13.6 $\pm$ 0.8                            |
| APM / $V_M$                                            | 87 / 991                                              | 61 / 964                                              |                                           |                                           |
| Tail Roughness / $\text{\AA}$                          | not reported                                          | not reported                                          | 3.5 $\pm$ 0.2                             | 4.8 $\pm$ 0.4                             |
| Tail Solvation / % (solvated with air)                 | 30                                                    | 20                                                    | 0                                         | 0                                         |

## REFERENCES

- 1 G. Hazell, A. P. Gee, T. Arnold, K. J. Edler and S. E. Lewis, *J. Colloid Interface Sci.*, 2016, **474**, 190–198.
- 2 F. M. Menger and S. A. A. Rizvi, *Langmuir*, 2011, **27**, 13975–13977.
- 3 G. Qu, J. Cheng, J. Wei, T. Yu, W. Ding and H. Luan, *J. Surfactants Deterg.*, 2011, **14**, 31–35.
- 4 F. Gambinossi, B. Mecheri, M. Nocentini, M. Puggelli and G. Caminati, *Biophys. Chem.*, 2004, **110**, 101–117.
- 5 S. J. J. Johnson, T. M. M. Bayerl, W. Weihan, H. Noack, J. Penfold, R. K. K. Thomas, D. Kanellas, A. R. R. Rennie and E. Sackmann, *Biophys. J.*, 1991, **60**, 1017–25.
